# Supplementary material for: Hydroponic Production of Selenium-Enriched Baby Leaves of Swiss Chard (Beta vulgaris var. cicla) and Its Wild Ancestor Sea Beet (Beta vulgaris ssp. maritima)
Source: MDPI journal article supplement (doi:10.3390/horticulturae9080909), 2023-08-10
Supplement: s1 [file s1]

## SUPPLEMENTARY MATERIAL

**Table S1** Basic information on the experiment with plants of *Beta vulgaris* subsp. *vulgaris* var. *cicla* and *Beta vulgaris* subsp. *maritima* grown hydroponically (floating raft system) under greenhouse conditions.

|                                                                    | 1 <sup>st</sup> experiment |
|--------------------------------------------------------------------|----------------------------|
| Sowing date                                                        | 7 September 2021           |
| Transplant date                                                    | 8 October 2021             |
| Start of treatment                                                 | 11 October 2021            |
| Harvest date                                                       | 18 October 2021            |
| Days of treatment                                                  | 7 (10)*                    |
| Mean air temperature (°C)                                          | 20.5**                     |
| Mean daily solar radiation (MJ m <sup>-2</sup> day <sup>-1</sup> ) | 7.7**                      |
| Cumulative solar radiation (MJ m <sup>-2</sup> )                   | 84.5**                     |

\* The figure within brackets is the number of days after transplanting.

\*\* The values were computed for the period from transplanting to the first cut.

**Table S2** Crop yield (total leaf fresh biomass) and leaf dry biomass (DM), dry matter content (percent DM/FM ratio), leaf area index (LAI), leaf succulence (LS) and Se content, expressed on a dry matter basis, in plants of Swiss chard (*Beta vulgaris* subsp. *vulgaris* var. *cicla*) and sea beet (*Beta vulgaris* subsp. *maritima*) grown hydroponically (floating system) with different selenium (Se) concentrations in the nutrient solutions (**first experiment**).

| Beta subsp.      | Se concentration<br>(mg L <sup>-1</sup> ) | Yield<br>kg m <sup>-2</sup> | Leaf DM<br>g m <sup>-2</sup> | DM/FM<br>% | LAI     | LS<br>kg m <sup>-2</sup> | Se<br>mg kg <sup>-1</sup> DW |
|------------------|-------------------------------------------|-----------------------------|------------------------------|------------|---------|--------------------------|------------------------------|
| Swiss chard      | 0                                         | 1.94                        | 52.11                        | 2.71       | 2.37 de | 0.821                    | bdl                          |
|                  | 1                                         | 2.13                        | 62.43                        | 2.97       | 4.67 ab | 0.462                    | 5.12                         |
|                  | 3                                         | 2.01                        | 60.71                        | 3.05       | 4.84 a  | 0.414                    | 14.25                        |
|                  | 5                                         | 2.01                        | 60.63                        | 3.02       | 4.79 a  | 0.421                    | 27.16                        |
|                  |                                           |                             |                              |            |         |                          |                              |
| Sea beet         | 0                                         | 1.95                        | 55.58                        | 2.85       | 2.33 e  | 0.845                    | bdl                          |
|                  | 1                                         | 1.80                        | 55.53                        | 3.11       | 3.37 cd | 0.536                    | 4.85                         |
|                  | 3                                         | 1.44                        | 56.17                        | 4.16       | 3.54 c  | 0.403                    | 15.12                        |
|                  | 5                                         | 1.57                        | 60.63                        | 3.99       | 3.66 bc | 0.447                    | 22.10                        |
|                  |                                           |                             |                              |            |         |                          |                              |
| Swiss chard      |                                           | 2.02 a                      | 58.97                        | 2.94       | 4.17 a  | 0.530                    | 15.51                        |
| Sea beet         |                                           | 1.69 b                      | 56.98                        | 3.53       | 3.23 b  | 0.558                    | 14.02                        |
|                  | 0                                         | 1.94                        | 53.84                        | 2.78       | 2.35 b  | 0.833 a                  | bdl                          |
|                  | 1                                         | 1.96                        | 58.98                        | 3.04       | 4.02 a  | 0.499 b                  | 4.99 c                       |
|                  | 3                                         | 1.72                        | 58.44                        | 3.60       | 4.19 a  | 0.409 b                  | 14.68 b                      |
|                  | 5                                         | 1.79                        | 60.63                        | 3.50       | 4.22 a  | 0.434 b                  | 24.63 a                      |
| ANOVA            |                                           |                             |                              |            |         |                          |                              |
| Beta subsp.      |                                           | **                          | ns                           | ns         | ***     | ns                       | ns                           |
| Se concentration |                                           | ns                          | ns                           | ns         | ***     | ***                      | ***                          |
| Beta subsp. x Se |                                           | ns                          | ns                           | ns         | *       | ns                       | ns                           |

Means (n = 3) flanked by the same letter are not statistically different for P = 0.05 after Tukey's test. Significance level: \*\*\* P ≤ 0.001; \*\* P ≤ 0.01; \* P ≤ 0.05; ns = not significant.

**Table S3** Leaf content of Se, nitrate (NO<sub>3</sub><sup>-</sup>), total and soluble oxalate (OX), and total chlorophylls, carotenoids, phenols and flavonoids, and antioxidant capacity (FRAP index), expressed on a fresh weight basis, in plants of Swiss chard (*Beta vulgaris* subsp. *vulgaris* var. *cicla*) and sea beet (*Beta vulgaris* subsp. *Maritima*) grown hydroponically (floating system) with different selenium (Se) concentrations in the nutrient solutions(**first experiment**).

| Beta subsp.      | Se concentration      | Se      | NO <sub>3</sub> <sup>-</sup> | Total OX | Soluble OX | Soluble/total OX | Total chlorophylls | Carotenoid | Total phenols       | Flavonoids | FRAP                            |
|------------------|-----------------------|---------|------------------------------|----------|------------|------------------|--------------------|------------|---------------------|------------|---------------------------------|
|                  | (mg L <sup>-1</sup> ) |         | mg kg <sup>-1</sup>          |          |            | %                |                    |            | mg kg <sup>-1</sup> |            | mmol Fe(II) kg <sup>-1</sup> FW |
| Swiss chard      | 0                     | 0.000   | 773.7 e                      | 7207.6   | 4424.5 b   | 81.2             | 784.7 b            | 113.8      | 1.278               | 0.578      | 8.89 bc                         |
|                  | 1                     | 0.152   | 1101.1 d                     | 6134.5   | 5947.9 ab  | 90.4             | 777.3 b            | 113.7      | 1.196               | 0.553      | 8.99 bc                         |
|                  | 3                     | 0.430   | 1157.0 d                     | 7642.9   | 7280.5 a   | 84.3             | 697.2 b            | 104.1      | 1.089               | 0.585      | 7.65 c                          |
|                  | 5                     | 0.819   | 1065.1 de                    | 5990.4   | 5228.2 ab  | 87.3             | 719.9 b            | 116.0      | 0.970               | 0.594      | 7.76 c                          |
| Sea beet         | 0                     | 0.000   | 2409.3 a                     | 6732.2   | 5194.4 ab  | 75.1             | 807.2 b            | 49.7       | 1.281               | 1.019      | 10.27 b                         |
|                  | 1                     | 0.151   | 1944.4 b                     | 8485.4   | 5205.0 ab  | 70.2             | 1033.6 a           | 61.8       | 1.550               | 1.163      | 12.74 a                         |
|                  | 3                     | 0.618   | 1605.6 c                     | 9349.9   | 4521.5 b   | 82.3             | 1048.0 a           | 59.3       | 1.508               | 1.202      | 12.57 a                         |
|                  | 5                     | 0.916   | 1626.3 c                     | 9515.9   | 5002.6 ab  | 73.3             | 957.0 a            | 57.6       | 1.332               | 1.130      | 12.66 a                         |
| Swiss chard      |                       | 0.350   | 1024.2 b                     | 6743.8 b | 5720.3     | 85.8 a           | 744.8 b            | 111.9 a    | 1.133 b             | 0.577 b    | 8.32 b                          |
| Sea beet         |                       | 0.421   | 1896.4 a                     | 8520.9 a | 4980.9     | 75.2 b           | 961.5 a            | 57.1 b     | 1.418 a             | 1.128 a    | 12.06 a                         |
|                  | 0                     | 0.000 c | 1591.5 a                     | 6969.9   | 4809.5     | 78.2             | 796.0 b            | 81.8       | 1.280               | 0.798      | 9.58 b                          |
|                  | 1                     | 0.151 c | 1522.7 ab                    | 7309.9   | 5576.4     | 80.3             | 905.5 a            | 87.7       | 1.373               | 0.858      | 10.87 a                         |
|                  | 3                     | 0.524 b | 1381.3 b                     | 8496.4   | 5901.0     | 83.3             | 872.6 ab           | 81.7       | 1.299               | 0.894      | 10.11 ab                        |
|                  | 5                     | 0.868 a | 1345.7 b                     | 7753.2   | 5115.4     | 80.3             | 838.5 ab           | 86.8       | 1.151               | 0.862      | 10.21 ab                        |
| ANOVA            |                       |         |                              |          |            |                  |                    |            |                     |            |                                 |
| Beta subsp.      |                       | ns      | ***                          | *        | ns         | *                | ***                | ***        | ***                 | ***        | ***                             |
| Se concentration |                       | ***     | **                           | ns       | ns         | ns               | *                  | ns         | ns                  | ns         | **                              |
| Beta subsp. x Se |                       | ns      | ***                          | ns       | *          | ns               | ***                | ns         | ns                  | ns         | ***                             |

Means (n = 3) flanked by the same letter are not statistically different for P=0.05 after Tukey's test. Significance level: \*\*\* P ≤ 0.001; \*\* P ≤ 0.01; \* P ≤ 0.05; ns = not significant.

**Table S4** Amount of Se provided (Se EDI<sub>100</sub>), expressed as % of adequate intake (AI), and health risk index (HRI), for Se, NO<sub>3</sub><sup>-</sup> and oxalates, due to the consumption of 100 g of fresh leaves of Swiss chard (*Beta vulgaris* subsp. *vulgaris* var. *cicla*) and sea beet (*Beta vulgaris* subsp. *maritima*) plants grown hydroponically (floating system) with different selenium (Se) concentrations in the nutrient solution.

| Beta subsp. | Se<br>concentration<br>mg L <sup>-1</sup> | Se EDI <sub>100</sub><br>% AI | Se<br>HRI | NO <sub>3</sub> <sup>-</sup><br>HRI | Total OX<br>HRI |
|-------------|-------------------------------------------|-------------------------------|-----------|-------------------------------------|-----------------|
| Swiss chard | 0                                         | 0.0                           | 0.00      | 0.35                                | 0.37            |
|             | 1                                         | 11.5                          | 0.03      | 0.41                                | 0.25            |
|             | 3                                         | 33.3                          | 0.08      | 0.54                                | 0.23            |
|             | 5                                         | 112.4                         | 0.26      | 0.57                                | 0.38            |
| Sea beet    | 0                                         | 0.0                           | 0.00      | 1.10                                | 0.45            |
|             | 1                                         | 27.3                          | 0.06      | 0.86                                | 0.41            |
|             | 3                                         | 60.5                          | 0.14      | 0.84                                | 0.36            |
|             | 5                                         | 118.2                         | 0.28      | 0.81                                | 0.31            |
